# Supplementary material for: Observations and explicit modeling of isoprene chemical processing in polluted air masses in rural areas of the Yangtze River Delta region: radical cycling and formation of ozone and formaldehyde
Source: Copernicus journal article supplement (doi:10.5194/acp-2020-728), 2020-08-21
Supplement: Supplementary file 1 [file acp-2020-728-supplement.pdf]

## 1. Conditional Probability Function (CPF)

The CPF was originally used to show the wind directions that dominate a high concentration of a pollutant, showing the probability of such concentrations occurring by wind direction (Ashbaugh et al. 1985). The CPF is defined as:

$$CPF = \frac{m_{\theta,j}}{n_{\theta,j}}$$

Where  $m_{\theta,j}$  is the number of samples in the wind sector  $\theta$  and wind speed interval  $j$  with mixing ratios greater than high O<sub>3</sub> concentration. In this study, we defined high O<sub>3</sub> concentration as the 95th percentile of observed O<sub>3</sub> concentration (131 ppbv).  $n_{\theta,j}$  is the total number of samples in the wind sector  $\theta$  and wind speed interval  $j$ .

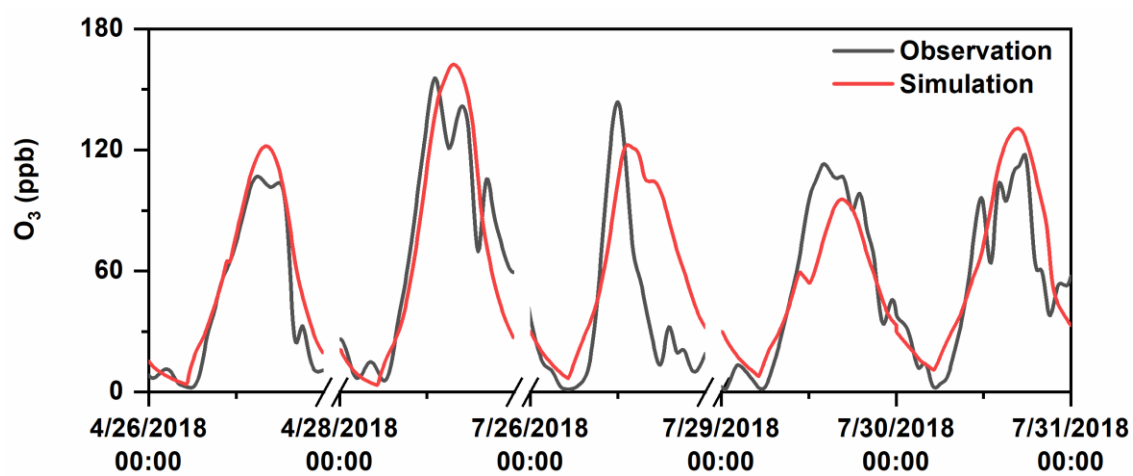

Figure S1. Comparison of observed and simulated  $O_3$  concentrations in 5 episodes.

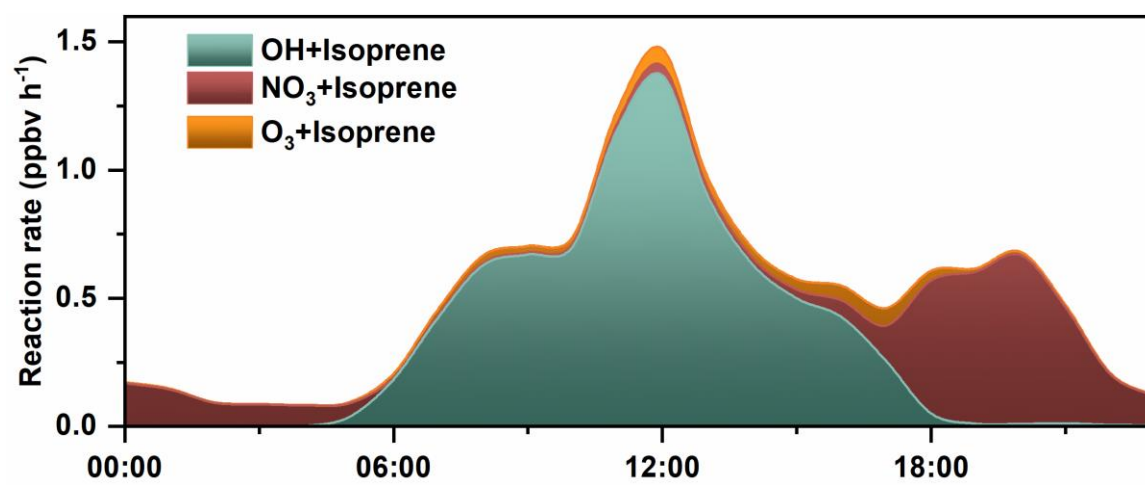

Figure S2. Average rates of loss pathways of isoprene in 5 episodes.

## **Reference**

Lowell L. Ashbaugh, William C. Malm, Willy Z. Sadeh. A residence time probability analysis of sulfur concentrations at grand Canyon National Park[J]. Atmospheric Environment, 1985, 19(8):1263-1270.
